## CORRECTION

# Correction: Reassessing the contribution of the Na<sup>+</sup>/H<sup>+</sup> exchanger Nhe3b to Na<sup>+</sup> uptake in zebrafish (*Danio rerio*) using CRISPR/Cas9 gene editing

Alex M. Zimmer, Khatereh Shir-Mohammadi, Raymond W. M. Kwong and Steve F. Perry

There was an error published in *Journal of Experimental Biology* (2020) **223**, jeb215111 (doi:10.1242/jeb.215111).

In Materials and Methods, 'Morpholino KD', the morpholino sequence targeting *slc9a3.2* (Nhe3b) was incorrectly written as 5'-CAGTT-GCCCATGTCTACAGCTTGAG-3'. The correct sequence of the injected Nhe3b morpholino is 5'-AGTAGAAAACGCCATATCAGAA-CGC-3'. Both the online full-text and PDF versions of the article have been updated.

The authors apologise to readers for this error.
